# Supplementary material
Source: PubMed Central journal article supplement (PMC7484055)
Supplement: NIHMS1605423-supplement-Supplemental_Material.pdf [file NIHMS1605423-supplement-Supplemental_Material.pdf]

## SUPPLEMENTAL MATERIAL

### **The gut microbiota restricts NETosis in acute mesenteric ischemia-reperfusion injury**

Stefanie Ascher<sup>1,2,#</sup>, Eivor Wilms<sup>1,#</sup>, Giulia Pontarollo<sup>1</sup>, Henning Formes<sup>1</sup>, Franziska Bayer<sup>1</sup>, Maria Müller<sup>1</sup>, Frano Malinarich<sup>1</sup>, Alexandra Grill<sup>1,3</sup>, Markus Bosmann<sup>1,4</sup>, Mona Saffarzadeh<sup>1</sup>, Inês Brandão<sup>1,5</sup>, Kathrin Groß<sup>1</sup>, Klytaimnistra Kiouptsi<sup>1</sup>, Jens M. Kittner<sup>6</sup>, Karl J. Lackner<sup>7</sup>, Kerstin Jurk<sup>1</sup>, Christoph Reinhardt<sup>1,3,\*</sup>

<sup>1</sup>Center for Thrombosis and Hemostasis (CTH), University Medical Center of the Johannes Gutenberg University of Mainz, Langenbeckstrasse 1, 55131 Mainz, Germany. <sup>2</sup>Institute for Pharmacy & Biochemistry, Johannes Gutenberg University of Mainz, Johann-Joachim-Becher-Weg 30, 55128 Mainz, Germany. <sup>3</sup>German Center for Cardiovascular Research, Partner Site RheinMain, Mainz, Germany. <sup>4</sup>Pulmonary Center, Department of Medicine, Boston University School of Medicine, Boston, MA 02118, USA. <sup>5</sup>Centro de Apoio Tecnológico Agro Alimentar (CATAA), Zona Industrial de Castelo Branco, Rua A, 6000-459 Castelo Branco, Portugal. <sup>6</sup>I. Department of Medicine, University Medical Center of the Johannes Gutenberg University of Mainz, Mainz, Germany. <sup>7</sup>Institute of Clinical Chemistry and Laboratory Medicine, University Medical Center Mainz, Mainz, Germany.

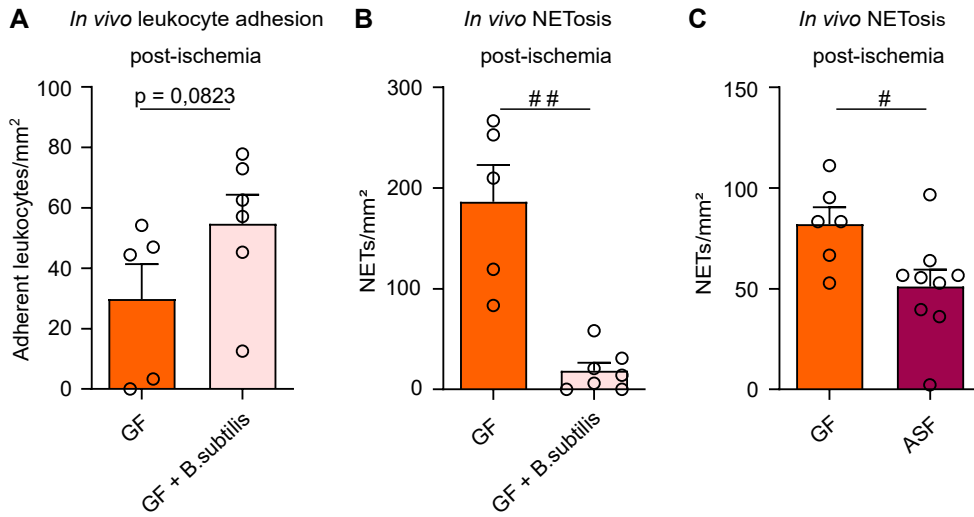

**Supplemental Figure I. Colonization leads to suppression of I/R-induced NETosis.** (A) Number of adhering leukocytes one hour post-ischemia in GF and *B.subtilis* monocolonized GF mice (5 vs 6 mice/group). For GF male mice and *B.subtilis* monocolonized GF female mice were used. (B) NETosis in mesenteric venules one hour post-ischemia in GF and *B.subtilis* monocolonized GF mice (5 vs 6 mice/group). For GF male mice and *B.subtilis* monocolonized GF female mice were used. (C) NETosis in mesenteric venules one hour post-ischemia in GF and altered Schaedler flora (ASF) mice (6 vs 9 mice/group). For GF and ASF male and female mice were used Results are shown as means ± s.e.m. Statistical comparison were performed using the Mann-Whitney (#) test, #p<0.05, ## p<0.01.

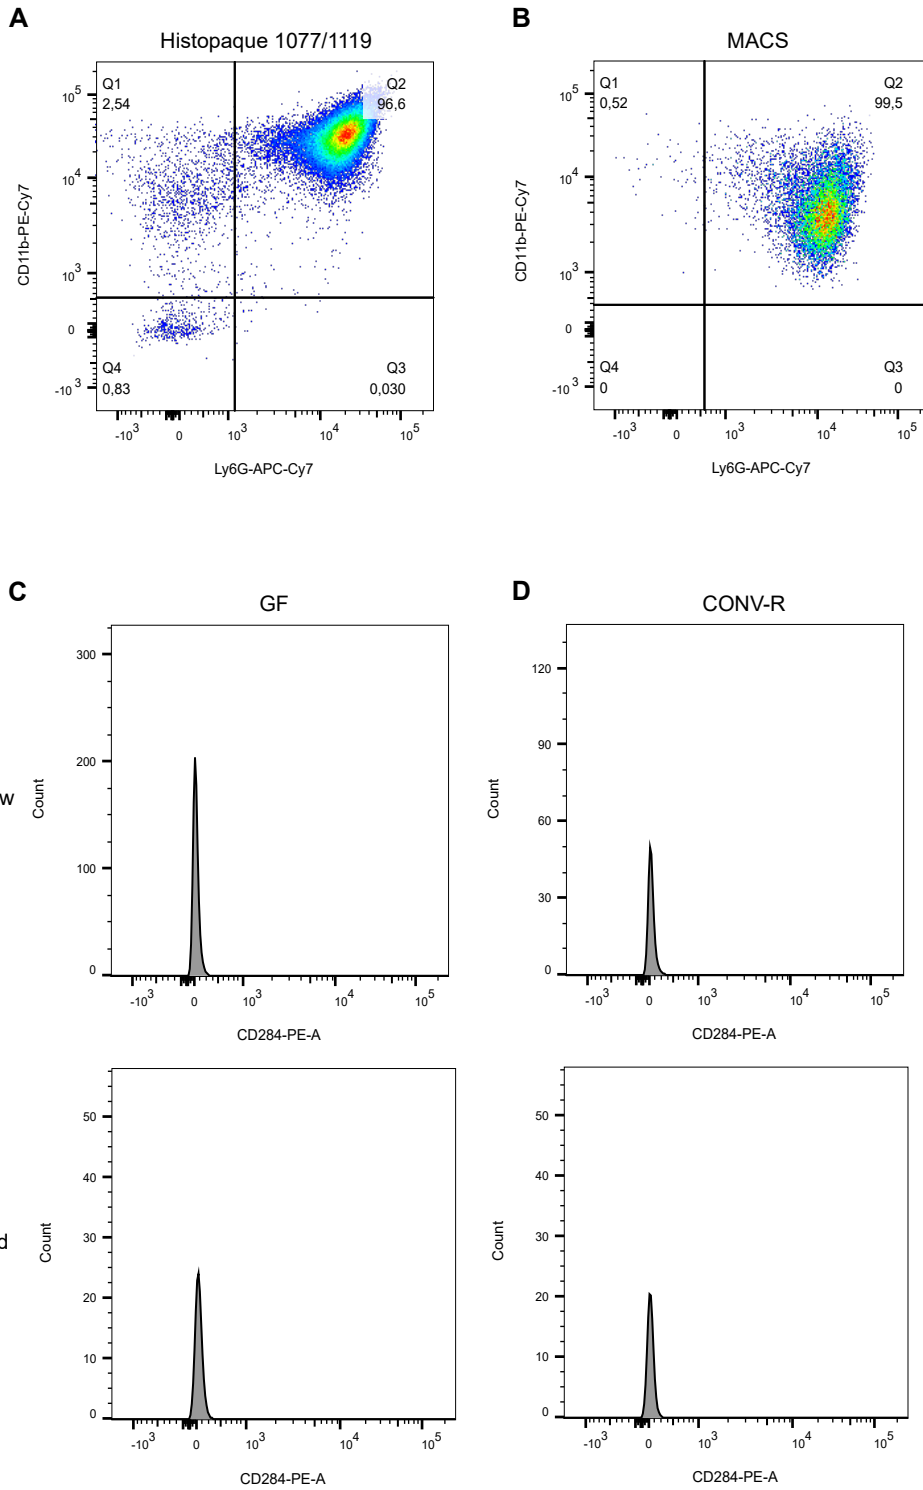

**Supplemental Figure II. FACS analysis of neutrophil isolation methods and TLR4 surface expression.** (A) Isolation protocol with Histopaque 1077/1119 density gradient centrifugation (representative FACS histogram). (B) Isolation with the magnetic cell sorting (MACS) isolation protocol (representative FACS histogram). (C, D) FACS quantification of neutrophil Toll-like receptor-4 (TLR4) surface expression. Bone marrow (upper panels) and blood (lower panels).

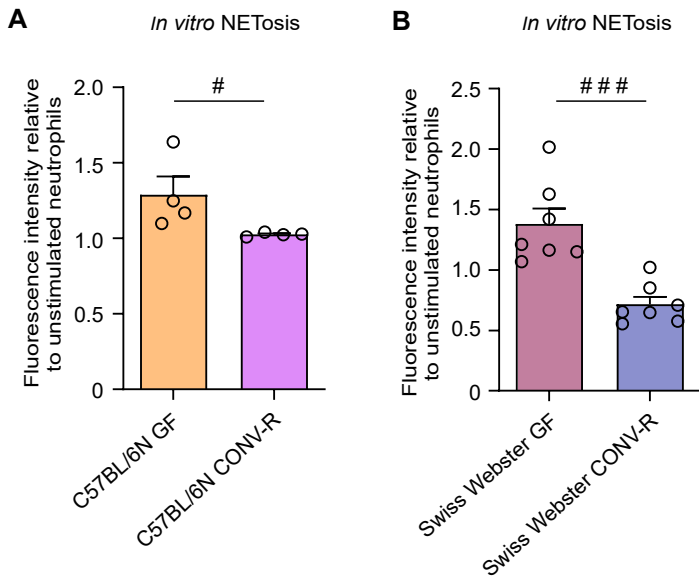

**Supplemental Figure III. Enhanced NET formation in GF mice is not strain dependent.** (A) LPS-induced *in vitro* NETosis of cultured bone marrow neutrophils from GF C57BL/6N and CONV-R C57BL/6N mice (4 vs 4 mice/group). For GF C57BL/6N and CONV-R C57BL/6N male and female mice were used. (B) LPS-induced *in vitro* NETosis of cultured bone marrow neutrophils from GF Swiss Webster and CONV-R Swiss Webster mice (7 vs 7 mice/group). For GF Swiss Webster and CONV-R Swiss Webster male and female mice were used. Results are shown as means  $\pm$  s.e.m. Statistical comparison were performed using the Mann-Whitney (#) test, # $p < 0.05$ , ### $p < 0.001$ .

**A** *In vivo* leukocyte adhesion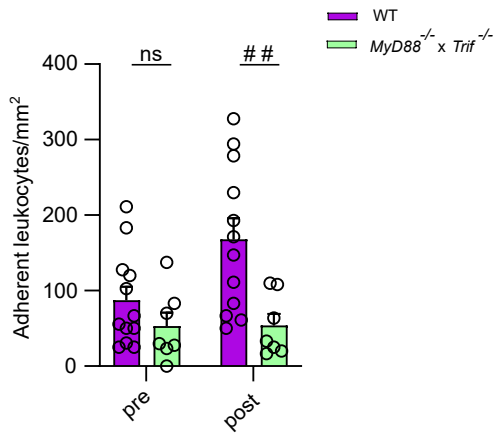**B**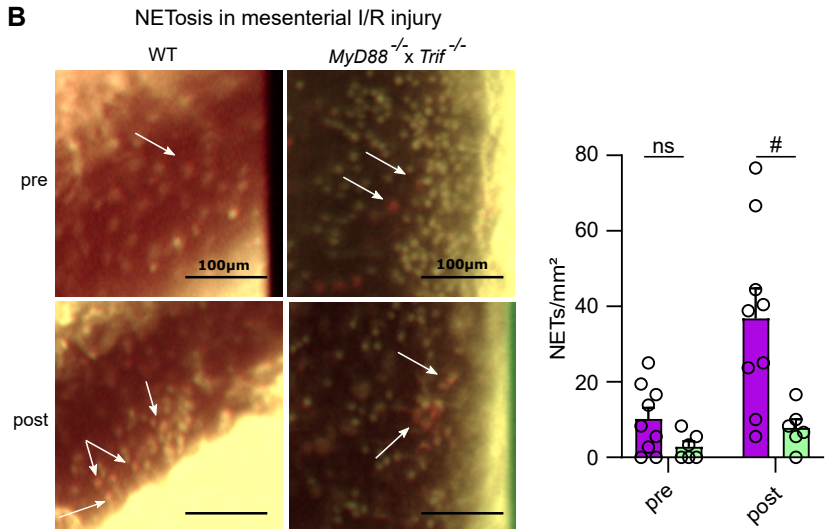

**Supplemental Figure IV. I/R-induced NETosis is diminished in *MyD88*<sup>-/-</sup> x *Trif*<sup>-/-</sup> double-deficient mice.** (A) Number of adhering leukocytes pre-ischemia and one hour post-ischemia in CONV-R (WT) and *MyD88*<sup>-/-</sup> x *Trif*<sup>-/-</sup> double-deficient mice (12 vs 7 mice/group). For WT and *MyD88*<sup>-/-</sup> x *Trif*<sup>-/-</sup> male and female mice were used (B) NETosis in mesenteric venules pre- and post-ischemia in CONV-R (WT) and *MyD88*<sup>-/-</sup> x *Trif*<sup>-/-</sup> double-deficient mice (9 vs 6 mice/group). For WT and *MyD88*<sup>-/-</sup> x *Trif*<sup>-/-</sup> male and female mice were used. Adherent leukocytes were stained with acridine orange; NETs were visualized by SYTOX orange. Results are shown as means ± s.e.m. Scale bare: 100 μm. Statistical comparison were performed using the Mann-Whitney (#) test, #p < 0.05, ##p < 0.01.

## Major Resources Table

### Animals (in vivo studies)

| Species                                         | Vendor or Source    | Background Strain | Sex             | Other Information                                                      |
|-------------------------------------------------|---------------------|-------------------|-----------------|------------------------------------------------------------------------|
| WT GF                                           | Breeding in our lab | C57BL/6J          | Male and Female | Sterile isolator                                                       |
| WT CONV-R                                       | Breeding in our lab | C57BL/6J          | Male and Female | SPF                                                                    |
| CONV-D                                          | -                   | C57BL/6J          | Female          | Conventionalisation of WT GF mice; SPF                                 |
| WT CONV-R + Abx                                 | -                   | C57BL/6J          | Male and Female | Administration of broad-spectrum antibiotics; SPF                      |
| WT GF + <i>E. coli</i>                          | -                   | C57BL/6J          | Male and Female | Monocolonisation with <i>Escherichia coli</i> ; in a sterile isolator  |
| WT GF + LPS                                     | -                   | C57BL/6J          | Male and Female | Administration of TLR4-agonist, in a sterile isolator                  |
| TLR4 <sup>-/-</sup>                             | Breeding in our lab | C57BL/6J          | Male and Female | SPF                                                                    |
| MyD88 <sup>-/-</sup>                            | Breeding in our lab | C57BL/6J          | Male and Female | SPF                                                                    |
| Trif <sup>-/-</sup>                             | Breeding in our lab | C57BL/6J          | Male and Female | SPF                                                                    |
| MyD88 <sup>-/-</sup> x Trif <sup>-/-</sup>      | Breeding in our lab | C57BL/6J          | Male and Female | SPF                                                                    |
| TLR4 <sup>wt/wt</sup> x VE-Cdh-Cre <sup>+</sup> | Breeding in our lab | C57BL/6J          | Female          | SPF                                                                    |
| TLR4 <sup>fl/fl</sup> x VE-Cdh-Cre <sup>+</sup> | Breeding in our lab | C57BL/6J          | Male and Female | SPF                                                                    |
| ASF                                             | Breeding in our lab | C57BL/6J          | Male and Female | Sterile isolator                                                       |
| WT GF + <i>B. subtilis</i>                      | -                   | C57BL/6J          | Male and Female | Monocolonisation with <i>Bacillus subtilis</i> ; in a sterile isolator |

### Cultured Cells (in vitro studies)

| Name                            | Species              | Vendour or Source   | Background Strain | Sex             | Other Information                                     |
|---------------------------------|----------------------|---------------------|-------------------|-----------------|-------------------------------------------------------|
| Bone marrow-derived neutrophils | WT GF                | Breeding in our lab | C57BL/6J          | Male and Female | Sterile isolator                                      |
|                                 | WT CONV-R            | Breeding in our lab | C57BL/6J          | Male and Female | SPF                                                   |
|                                 | WT GF + LPS          | -                   | C57BL/6J          | Male and Female | Administration of TLR4-agonist, in a sterile isolator |
|                                 | WT CONV-R + Abx      | -                   | C57BL/6J          | Male and Female | Administration of broad-spectrum antibiotics; SPF     |
|                                 | TLR4 <sup>-/-</sup>  | Breeding in our lab | C57BL/6J          | Male and Female | SPF                                                   |
|                                 | C57BL6-N GF          | Breeding in our lab | C57BL/6NRj        | Male and Female | Sterile isolator                                      |
|                                 | C57BL6-N CONV-R      | Janvier             | C57BL/6NRj        | Male and Female | SPF                                                   |
|                                 | Swiss Webster GF     | Breeding in our lab | Swiss Webster     | Male and Female | Sterile isolator                                      |
|                                 | Swiss Webster CONV-R | Breeding in our lab | Swiss Webster     | Male and Female | SPF                                                   |

### Antibodies

| Target antigen                                           | Vendor or Source  | Working concentration | Catalog # |
|----------------------------------------------------------|-------------------|-----------------------|-----------|
| Anti-Histone H3 (citrulline R2+R8+R17)                   | Abcam             | 4 µg/ml               | ab5103    |
| Alexa Fluor 555 donkey anti-rabbit IgG                   | Life Technologies | 4 µg/ml               | A-31572   |
| PE Rat Anti-Mouse CD162<br>Clone 2PH1                    | BD Bioscience     | 6 µg/ml               | 555306    |
| PerCP-CyTM5.5 Rat Anti-Mouse CD62L<br>Clone MEL-14       | BD Bioscience     | 6 µg/ml               | 560513    |
| V450 Rat anti-Mouse LY-6G and LY-6C<br>Clone RB6-8C5     | BD Bioscience     | 6 µg/ml               | 560453    |
| APC Mouse Anti-Human CD11b<br>Clone ICRF44               | BD Bioscience     | 6 µg/ml               | 550019    |
| APC anti-mouse Ly-6A/E (Sca-1)<br>Clone D7               | Biolegend         | 2,5 µg/ml             | 108112    |
| APC anti-mouse CD117 (c-Kit)<br>Clone 2B8                | Biolegend         | 1 µg/ml               | 105812    |
| APC anti-mouse NK-1.1<br>Clone PK136                     | Biolegend         | 2 µg/ml               | 108710    |
| APC anti-mouse TER-119/ Erythroid Cells<br>Clone TER-119 | Biolegend         | 1 µg/ml               | 116212    |
| APC anti-mouse CD3ε<br>Clone 145-2C11                    | Biolegend         | 1 µg/ml               | 100312    |
| APC anti-mouse CD19<br>Clone 6D5                         | Biolegend         | 2 µg/ml               | 115512    |

|                                                       |                |           |        |
|-------------------------------------------------------|----------------|-----------|--------|
| APC/Cy7 anti-mouse Ly-6G<br>Clone 1A8                 | Biolegend      | 1 µg/ml   | 127624 |
| PE/Cy7 anti-mouse/human CD 11b<br>Clone M1/70         | Biolegend      | 0,5 µg/ml | 101216 |
| Brilliant Violet 510™ anti-mouse Ly-6C<br>Clone HK1.4 | Biolegend      | 2 µg/ml   | 128033 |
| PE Rat IgG2a, κ<br>Clone RTK2758                      | Biolegend      | 2,5µg/ml  | 400508 |
| APC/Cy7 Rat IgG2a, κ<br>Clone RTK2758                 | Biolegend      | 1,2 µg/ml | 400524 |
| PE/Cy7 Rat IgG2b, κ<br>Clone RTK4530                  | Biolegend      | 0,5 µg/ml | 400618 |
| PE anti-mouse CD284 (TLR4)<br>Clone SA15-21           | Biolegend      | 2,5 µg/ml | 145404 |
| IRF-3 (D83B9) Rabbit mAb                              | Cell Signaling | 1:750     | 4302S  |
| Phospho-IRF3 (Ser386) (E7J8G) XP<br>Rabbit mAb        | Cell Signaling | 1:750     | 37829S |
| α-Actinin (D6F6) XP Rabbit mAb                        | Cell Signaling | 1:1000    | 6487S  |
